# Supplementary material for: The first convergent total synthesis of penarolide sulfate A2, a novel α-glucosidase inhibitor
Source: Royal Society of Chemistry journal article supplement (doi:10.1039/c3ob42364f), 2014-01-01

Supplementary Material (ESI) for Organic and Biomolecular Chemistry

This journal is © The Royal Society of Chemistry 2013

## Electronic Supporting Information (ESI) for:

First Convergent Total Synthesis of Penarolide Sulfate A<sub>2</sub>,

A Novel  $\alpha$ -glucosidase Inhibitor

| Contents                                                                                                  | Page    |
|-----------------------------------------------------------------------------------------------------------|---------|
| <sup>1</sup> H NMR and <sup>13</sup> C NMR Spectra                                                        | S2-S16  |
| H-H COSY for compound <b>23</b>                                                                           | S17     |
| <sup>1</sup> H NMR and <sup>13</sup> C NMR Spectra for compound <b>2</b>                                  | S18     |
| <sup>1</sup> H NMR and <sup>13</sup> C NMR Spectra for compound <b>2</b> compared<br>with natural product | S19-S20 |

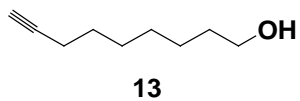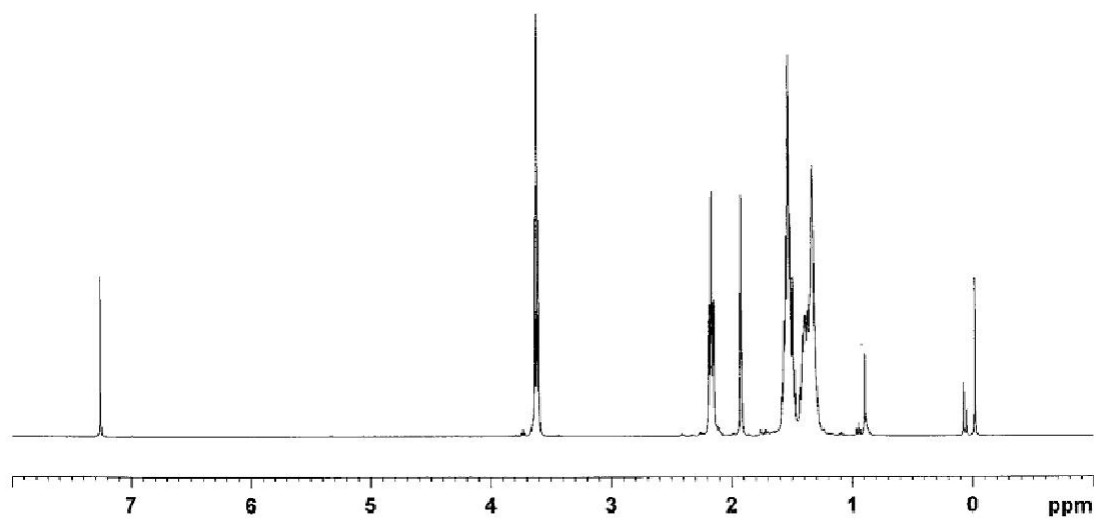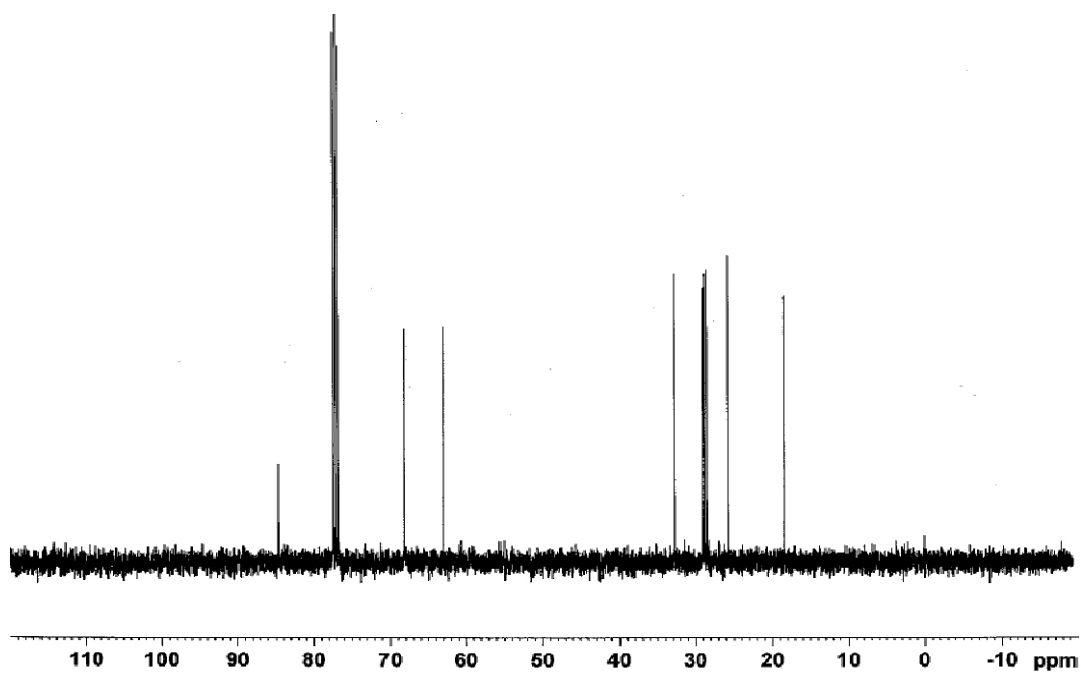

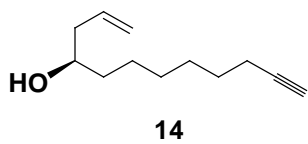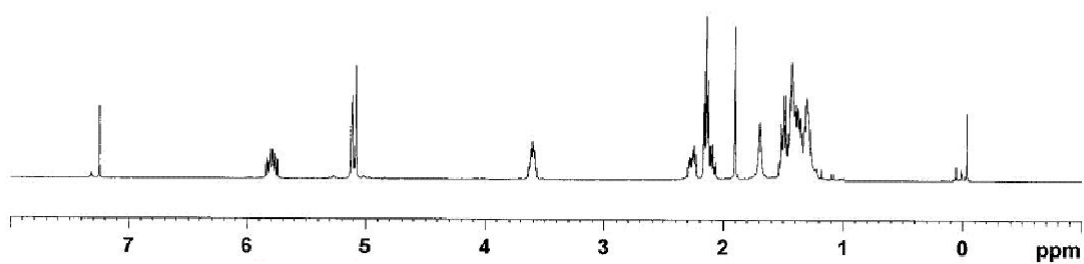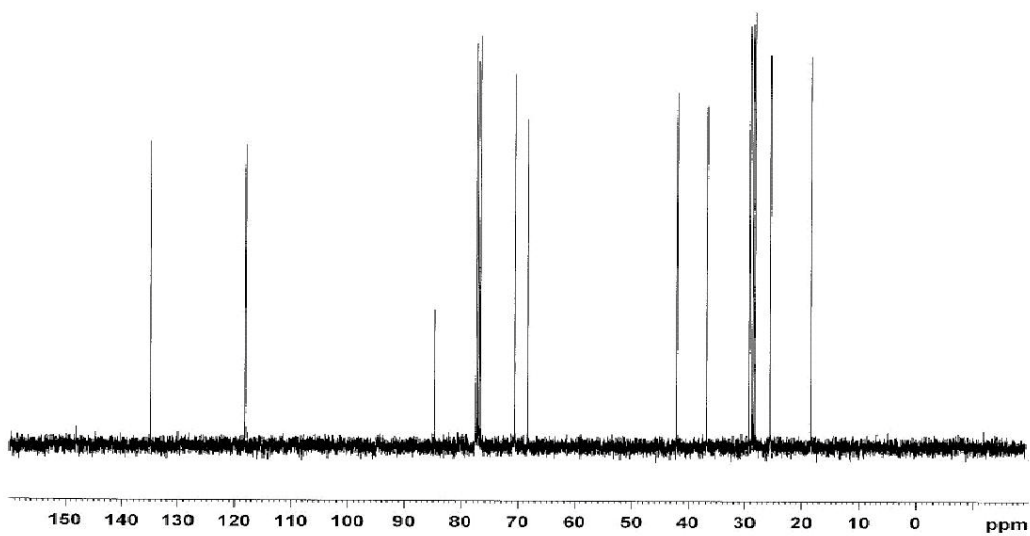

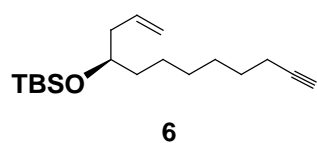

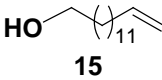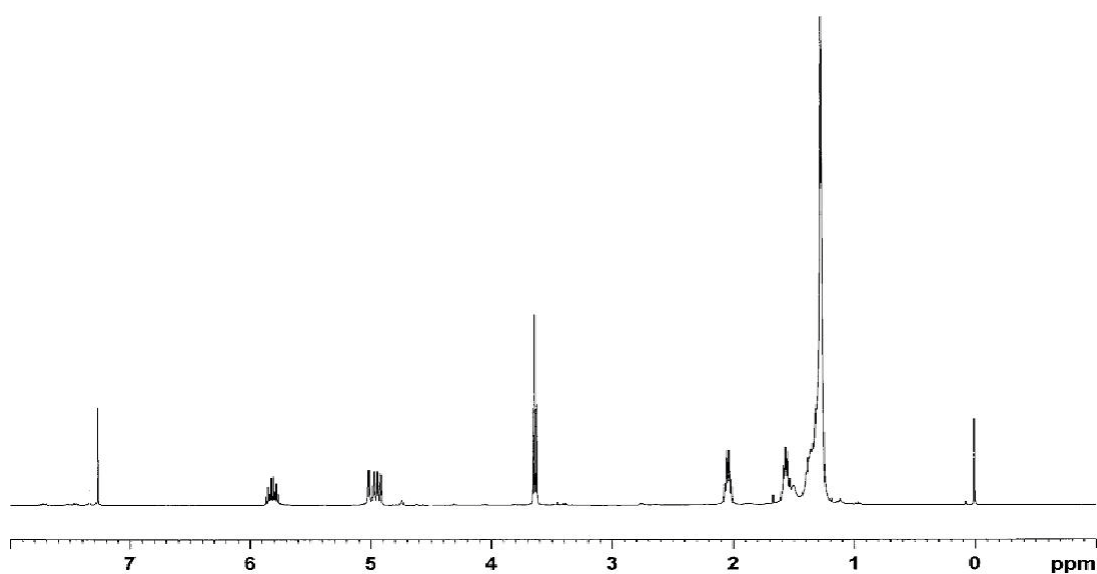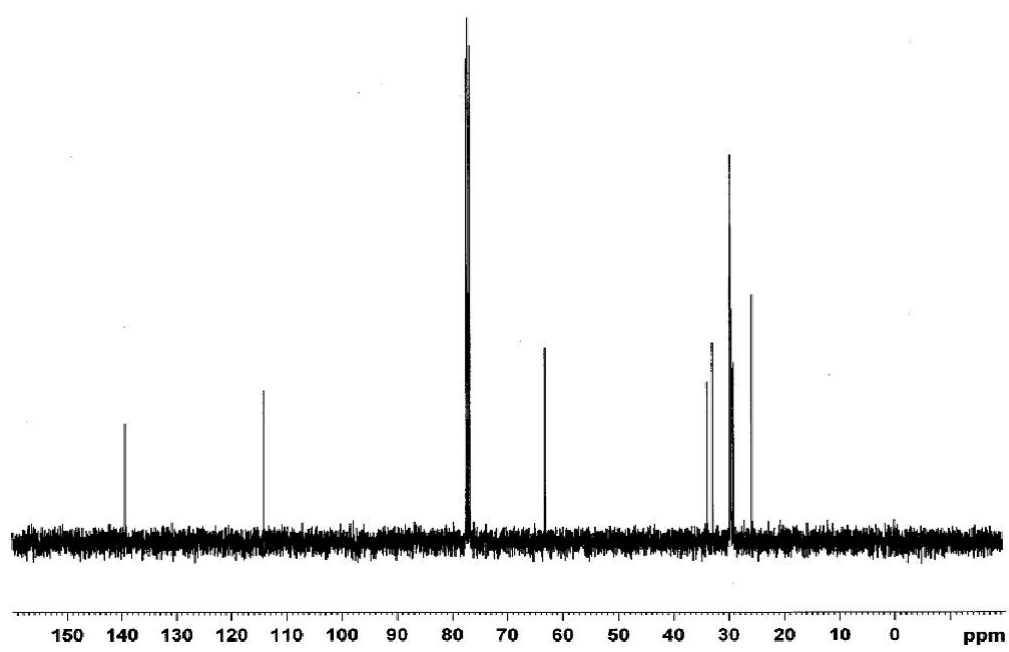

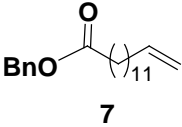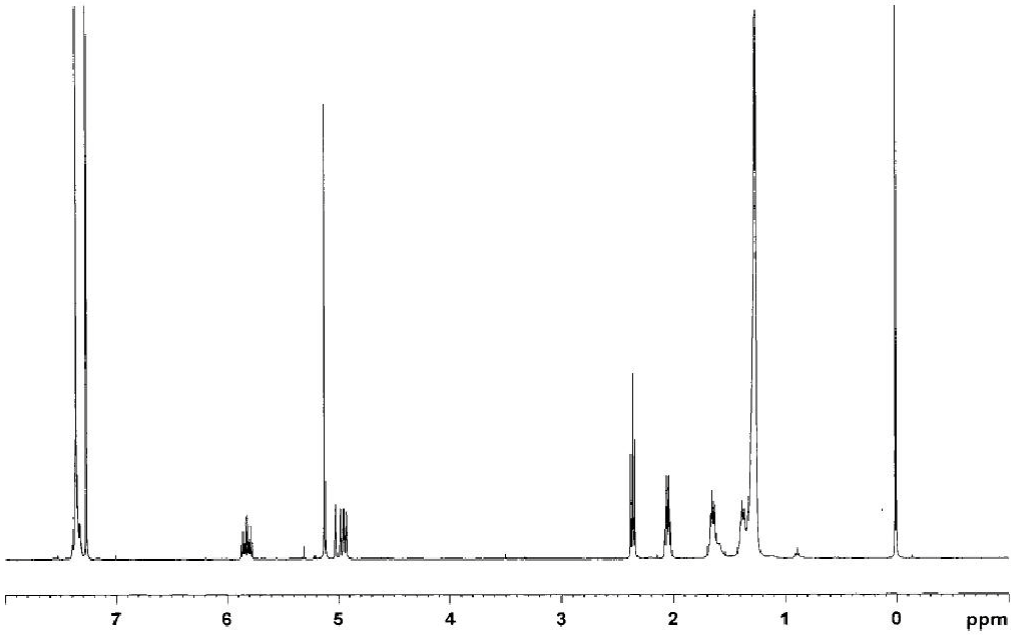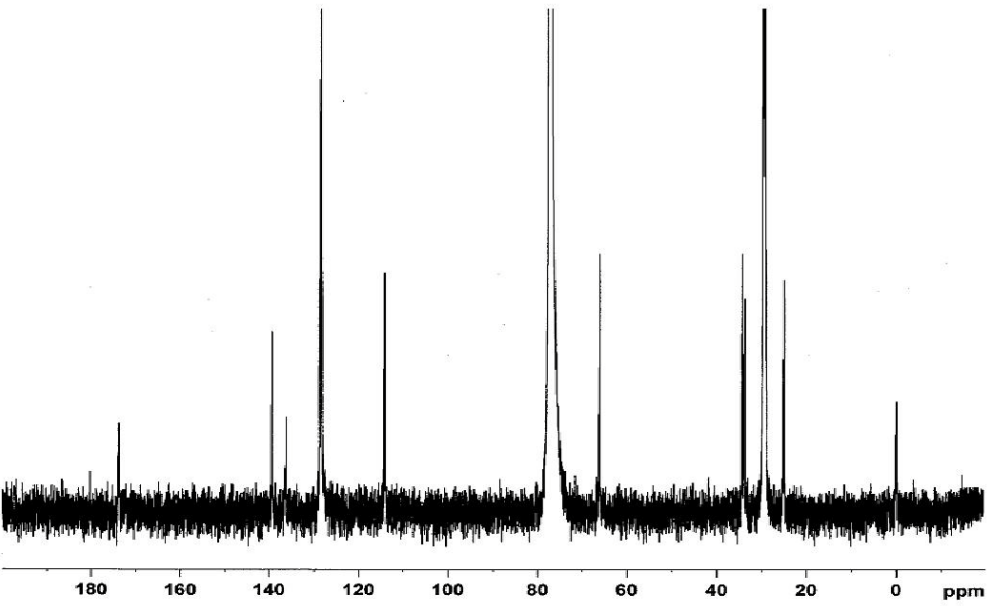

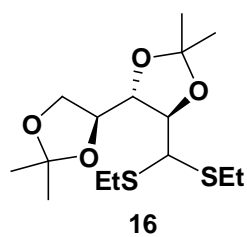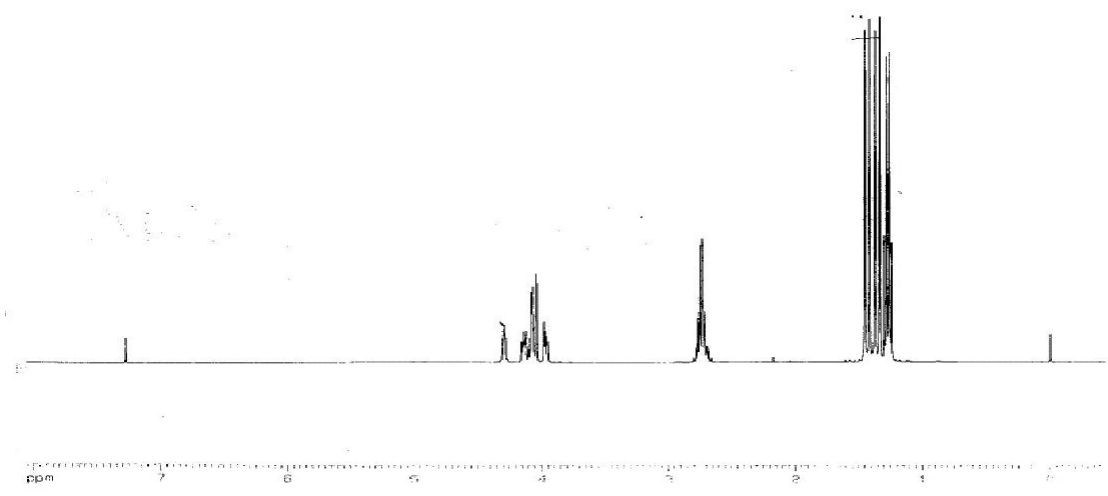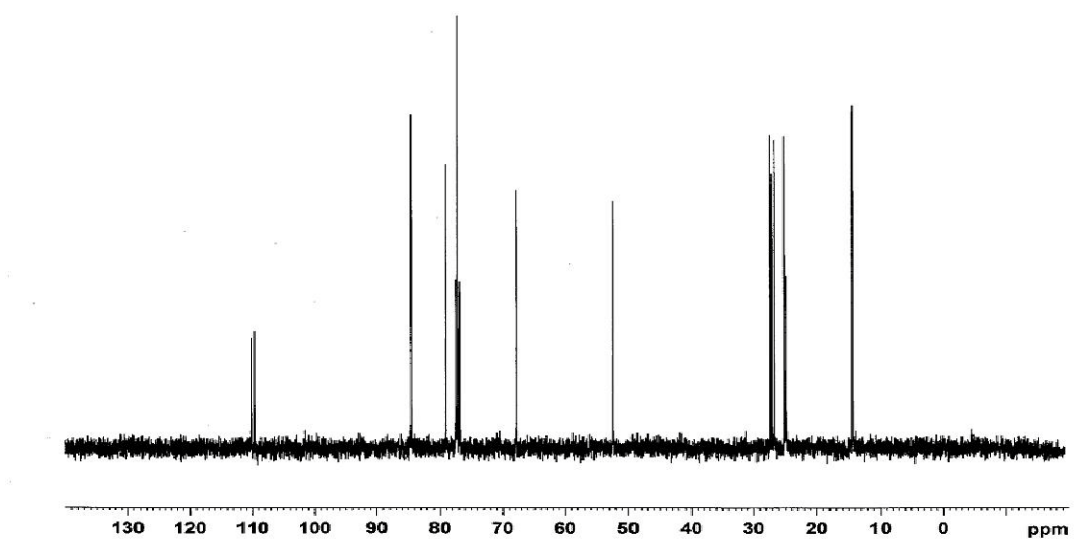

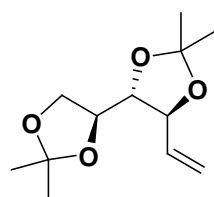

17

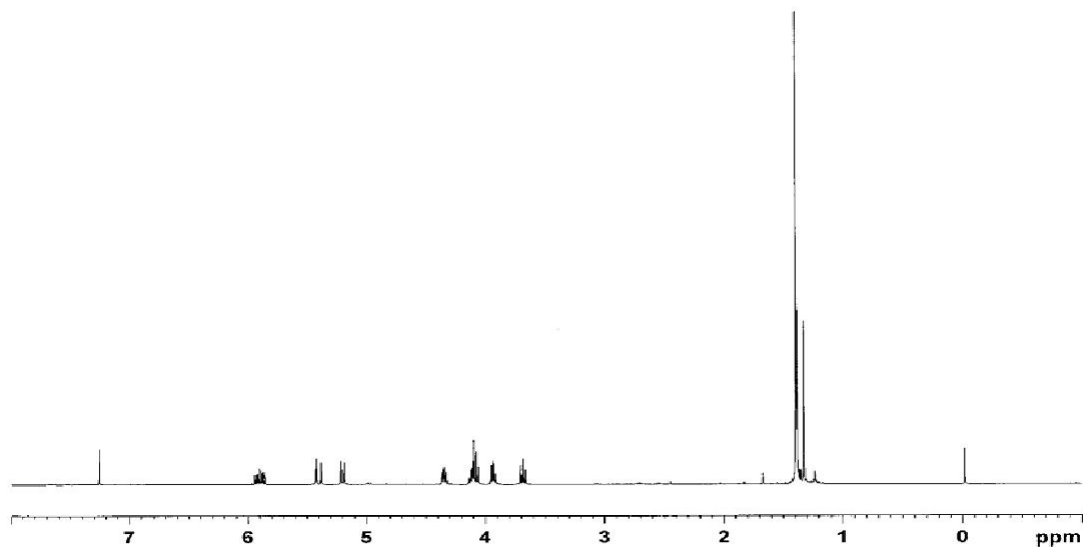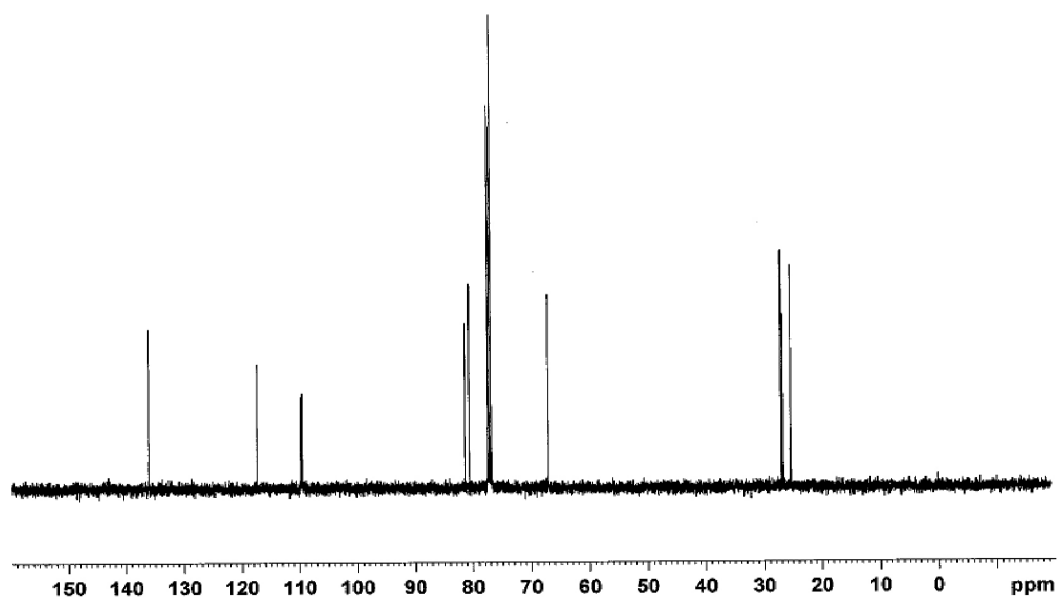



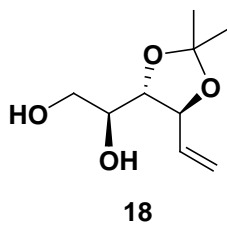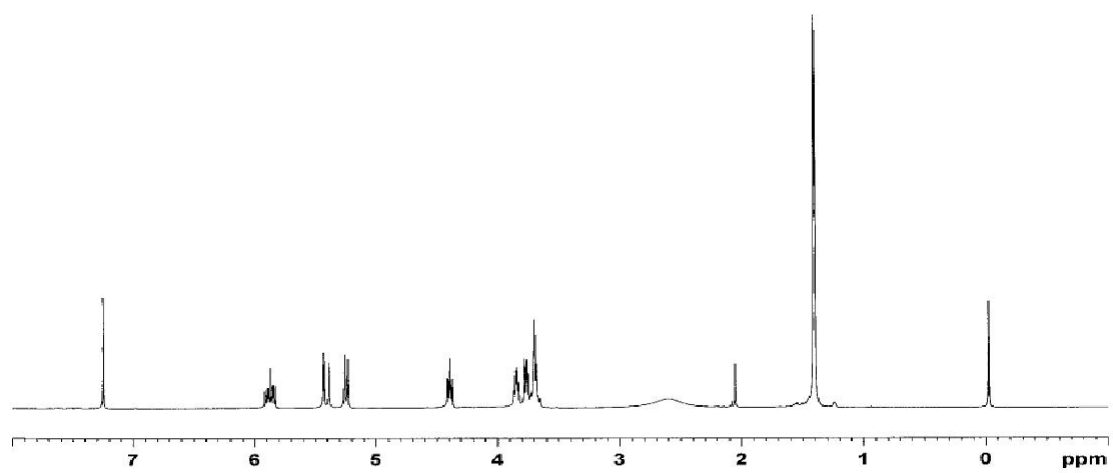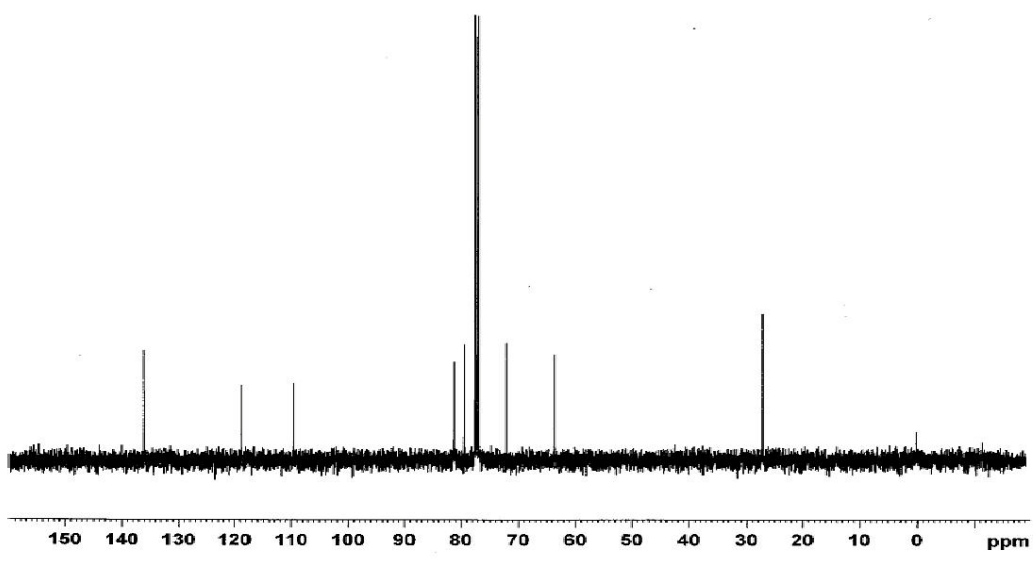

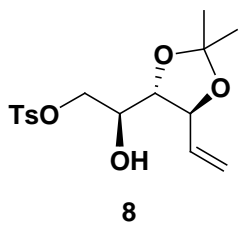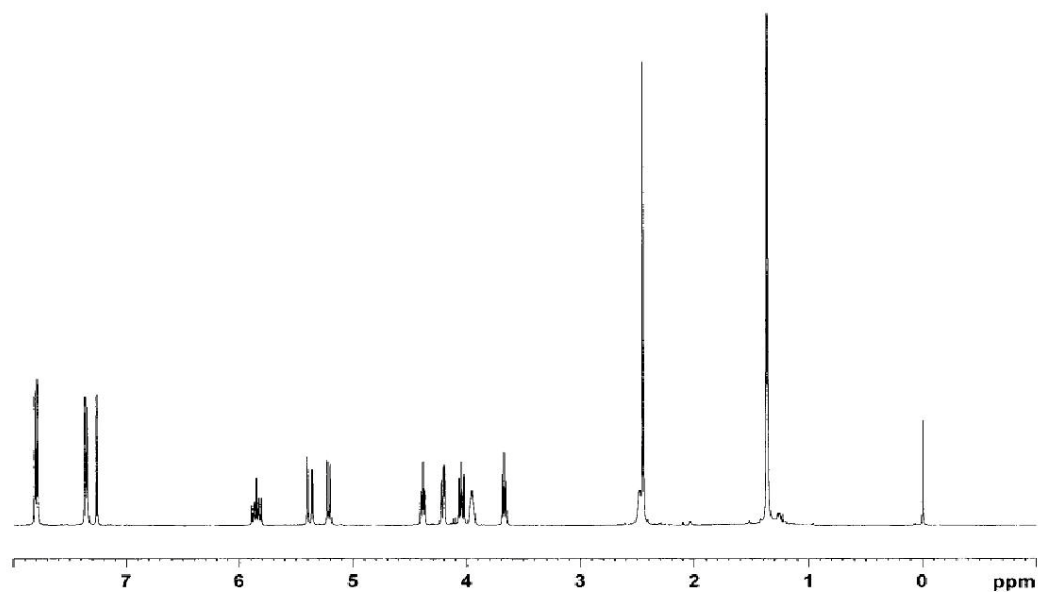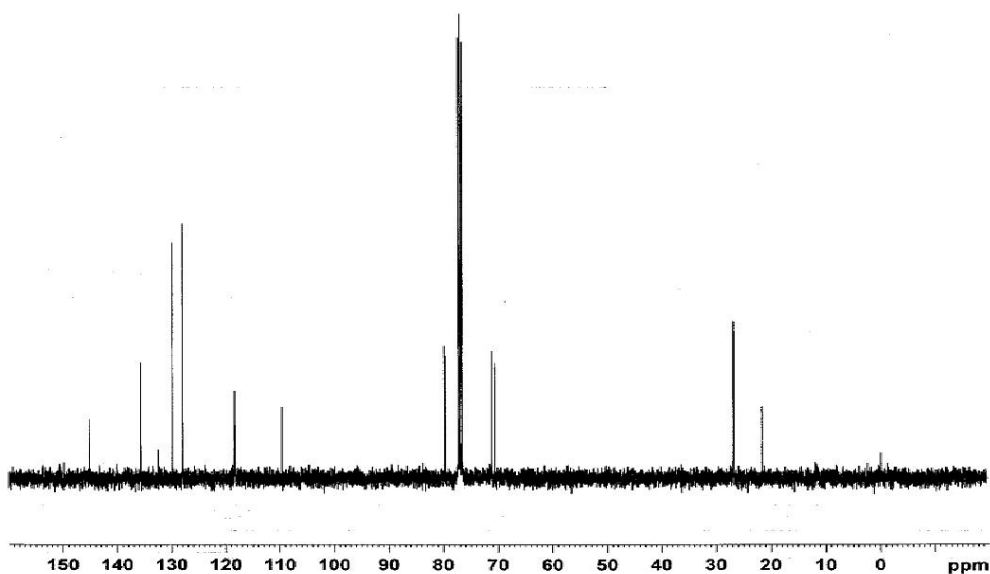

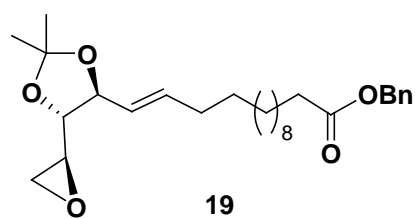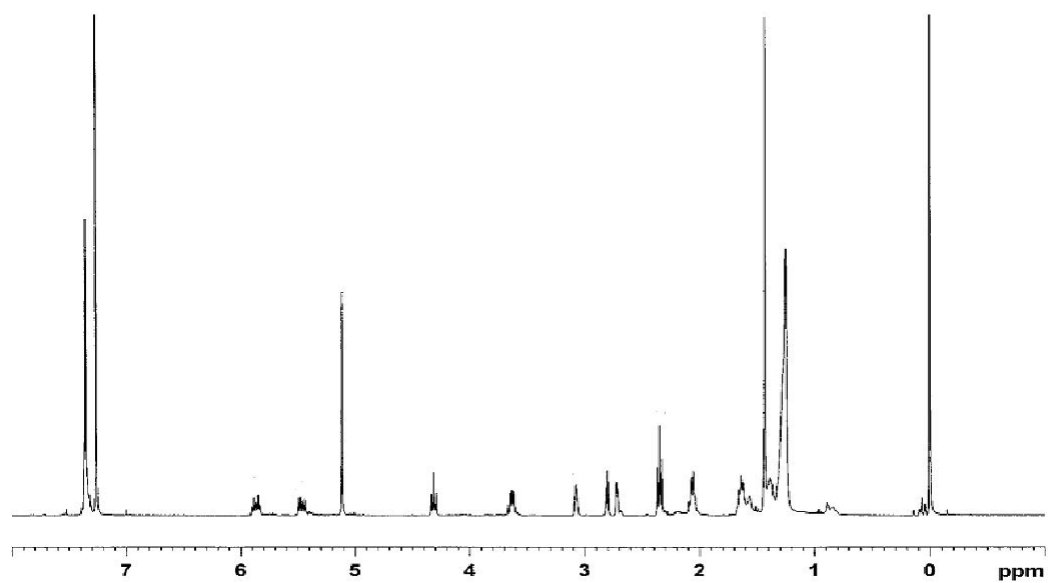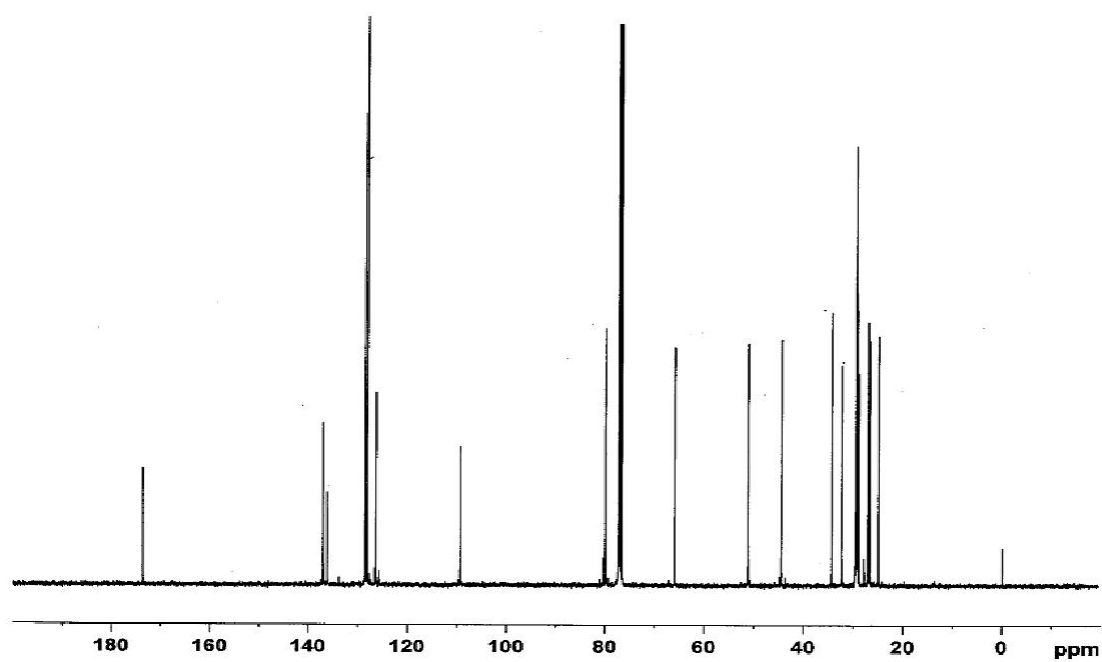

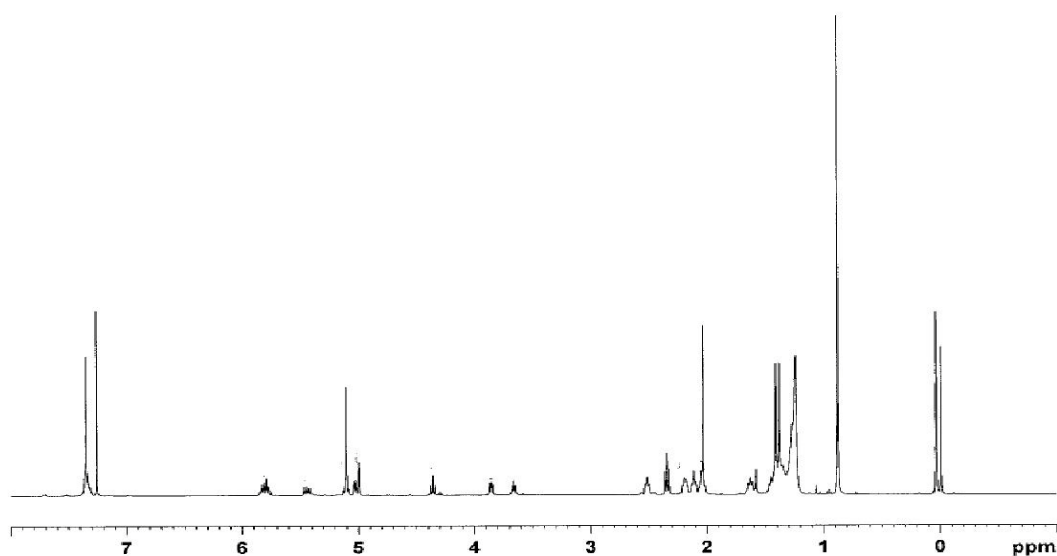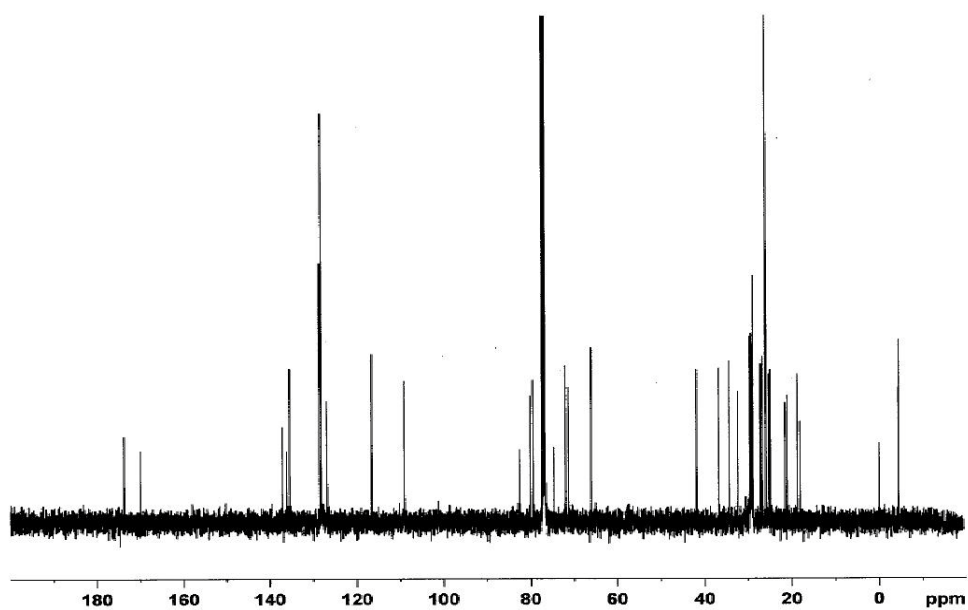

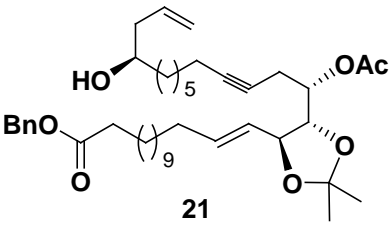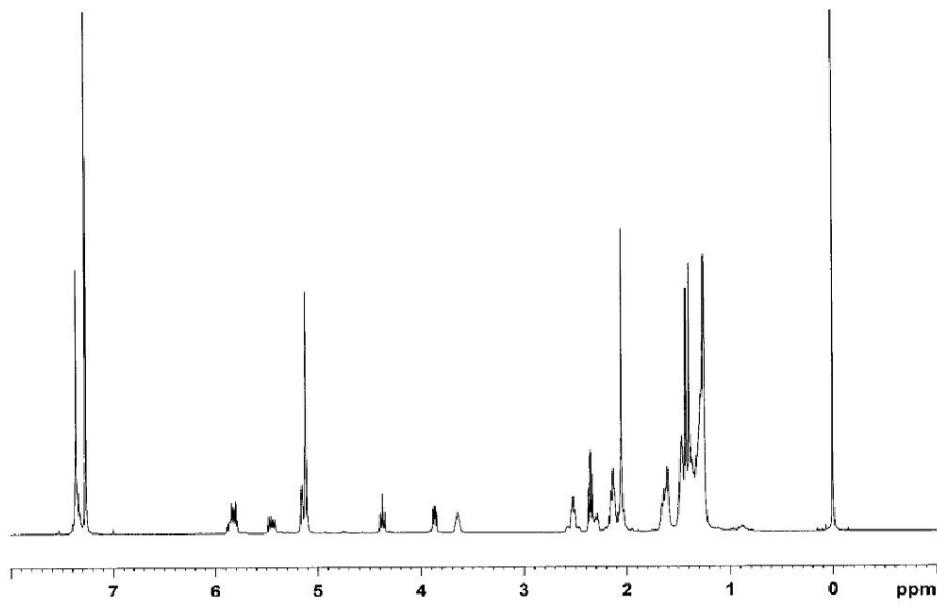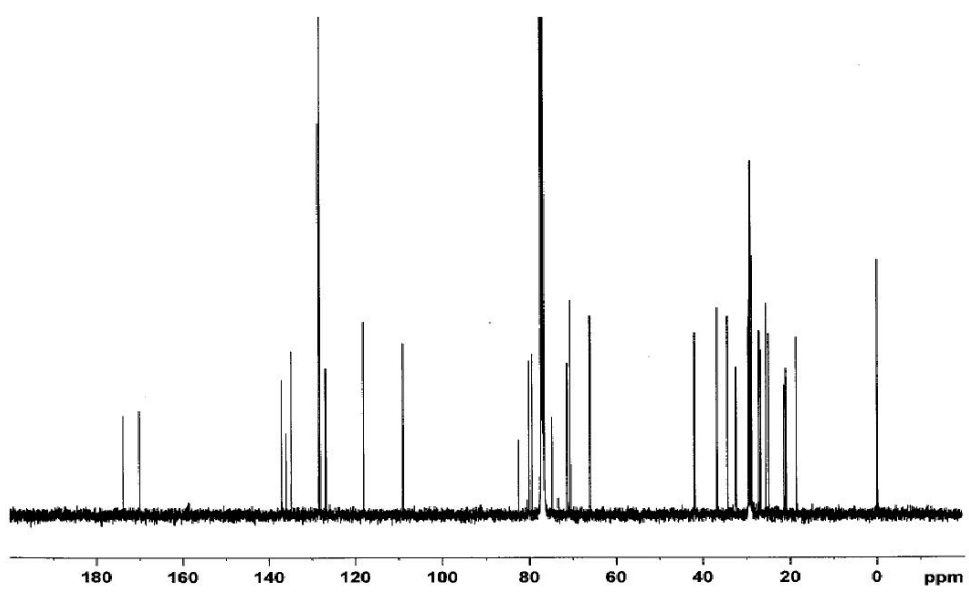

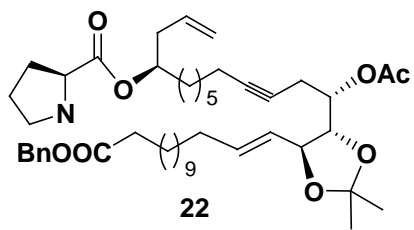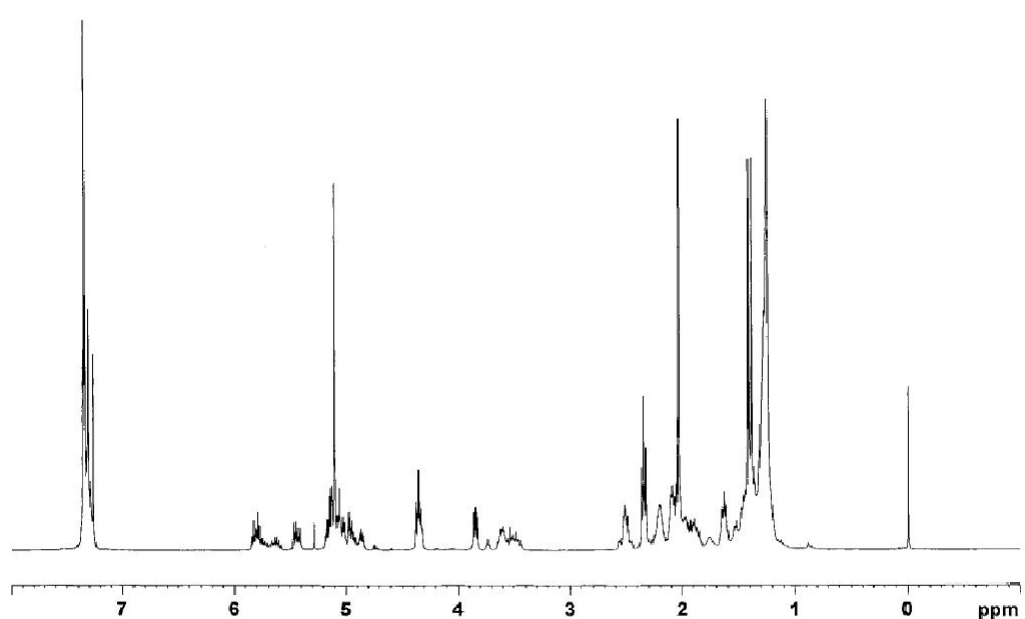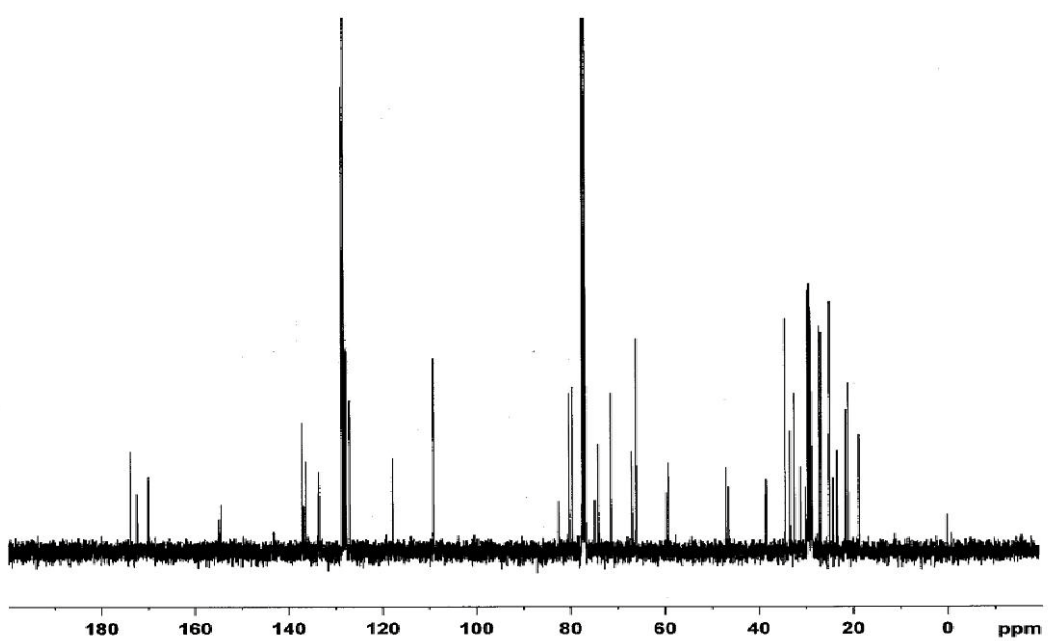

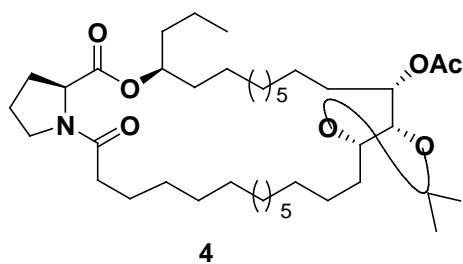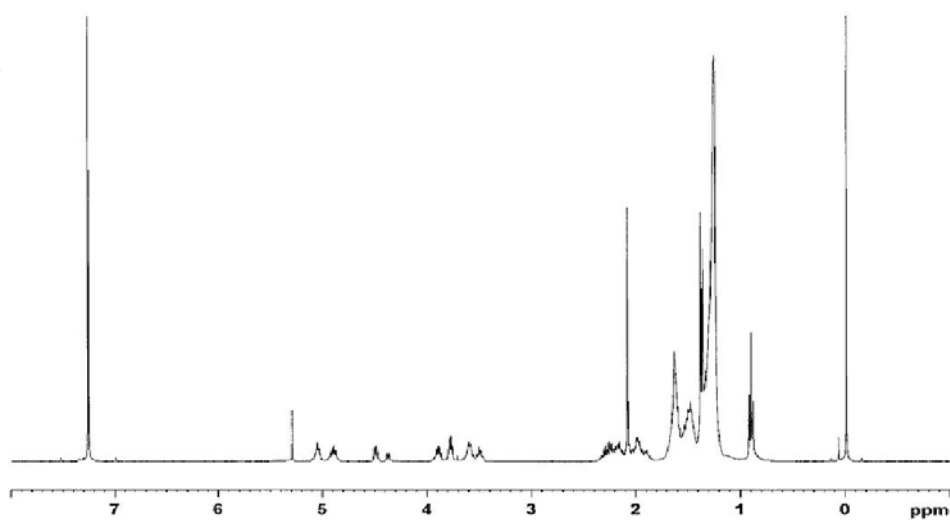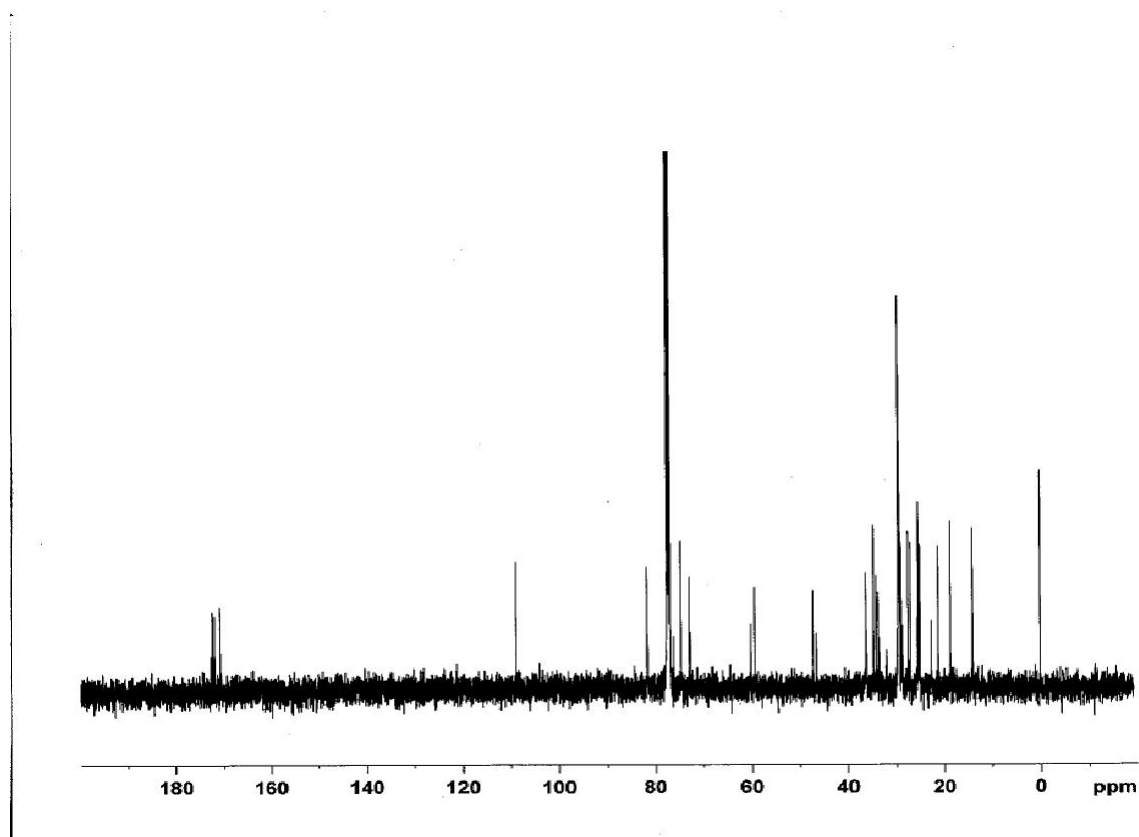

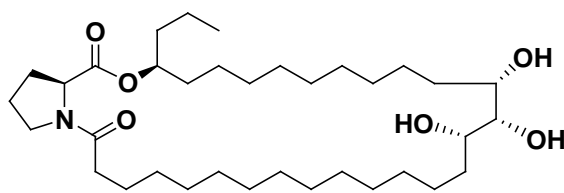

23

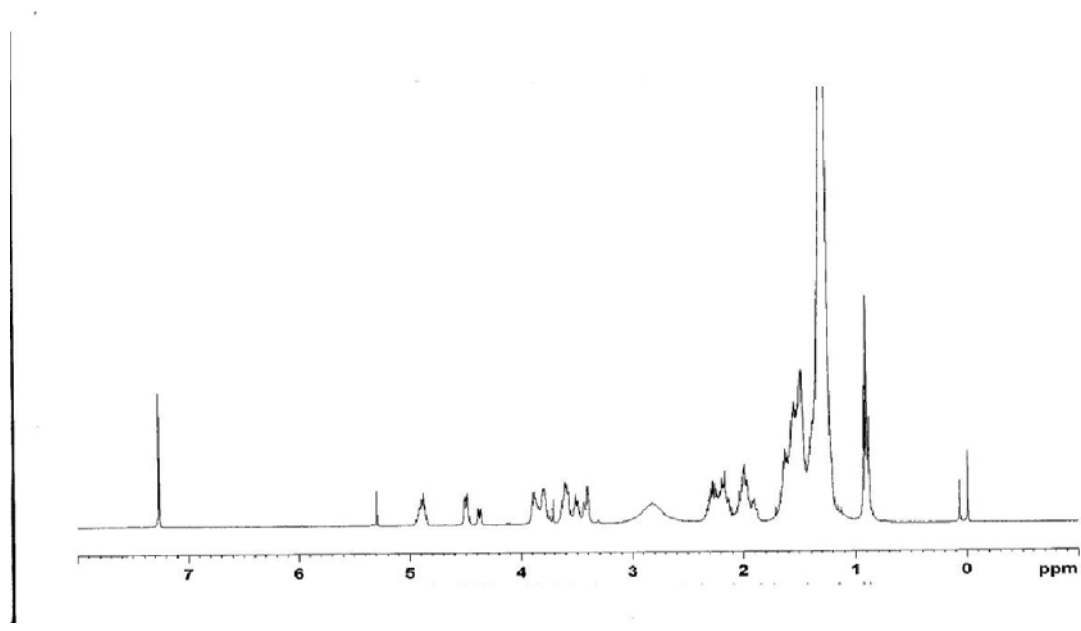

Fig. S1. <sup>1</sup>H NMR spectrum of compound 23 in CDCl<sub>3</sub> (400 MHz, TMS, 25 °C).

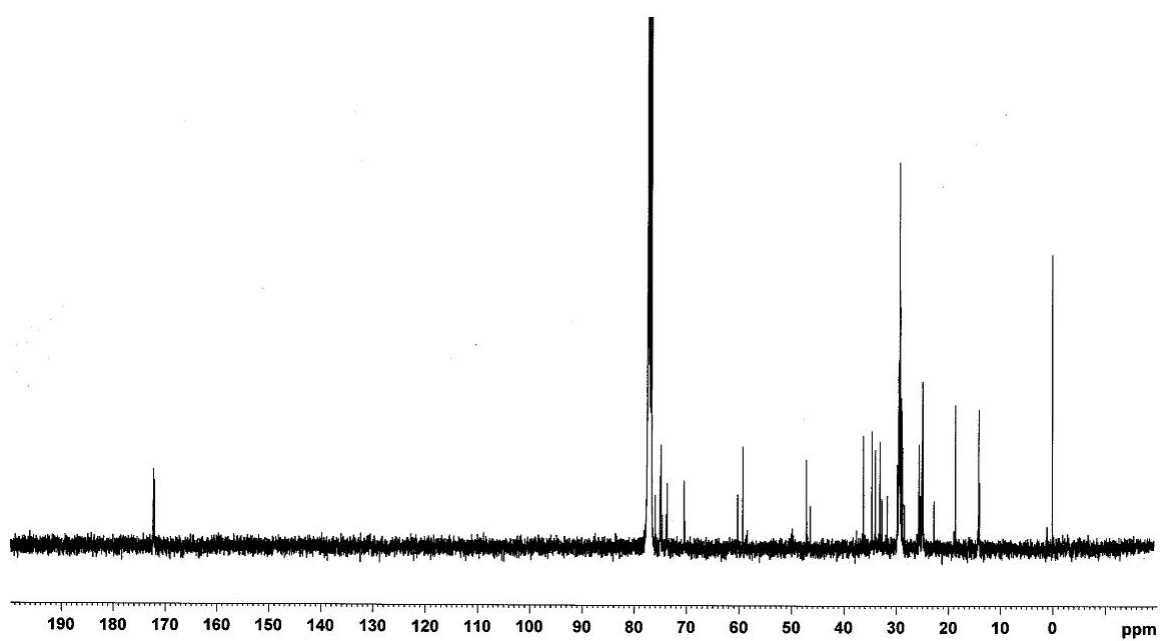



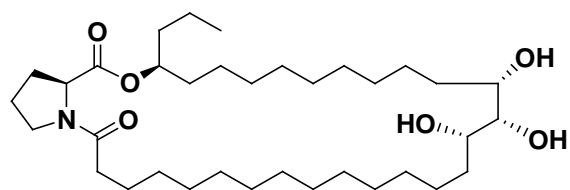

23

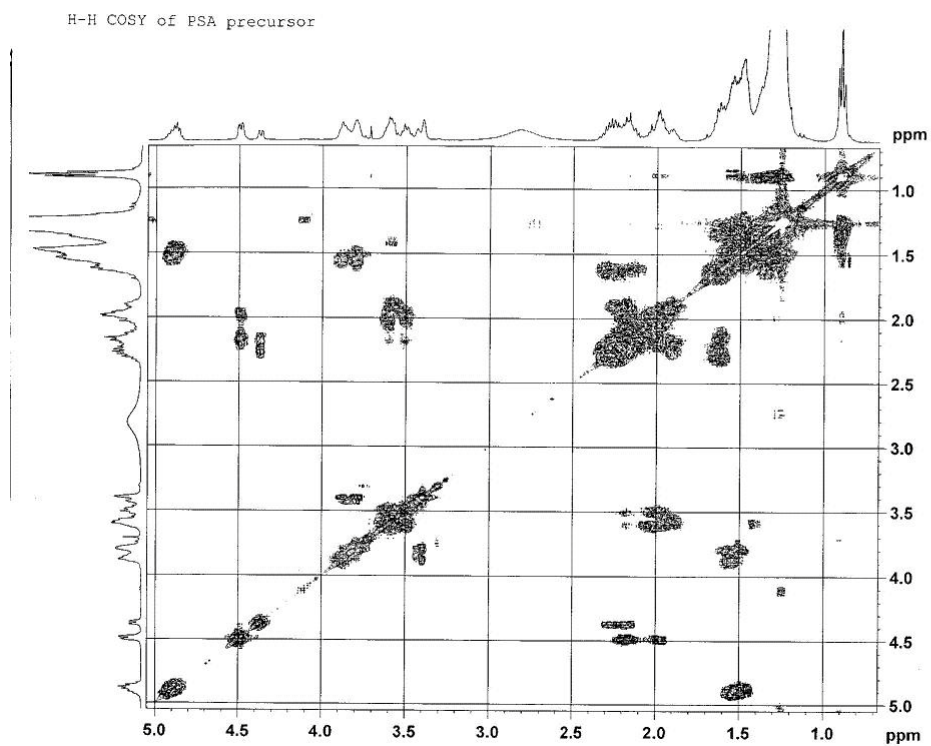

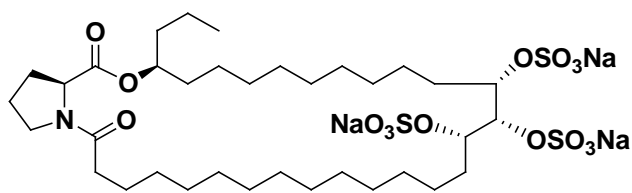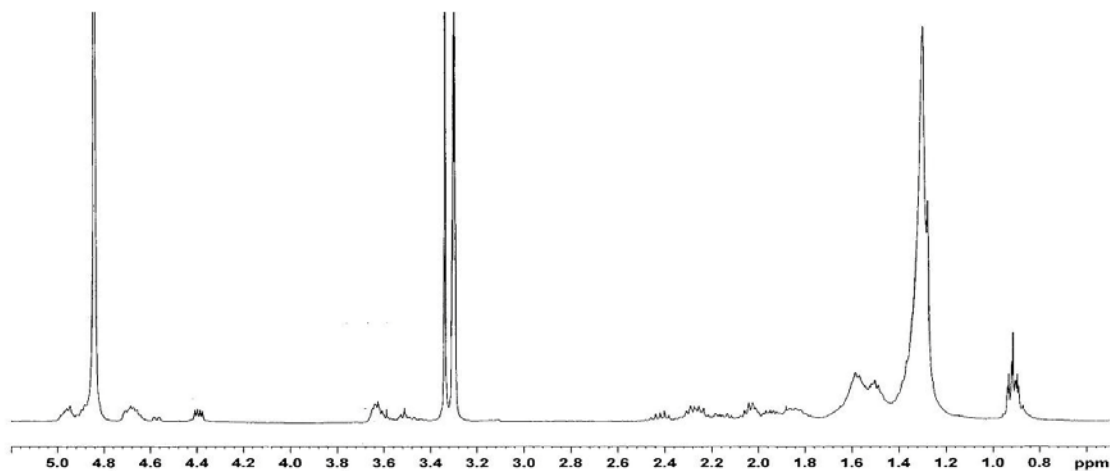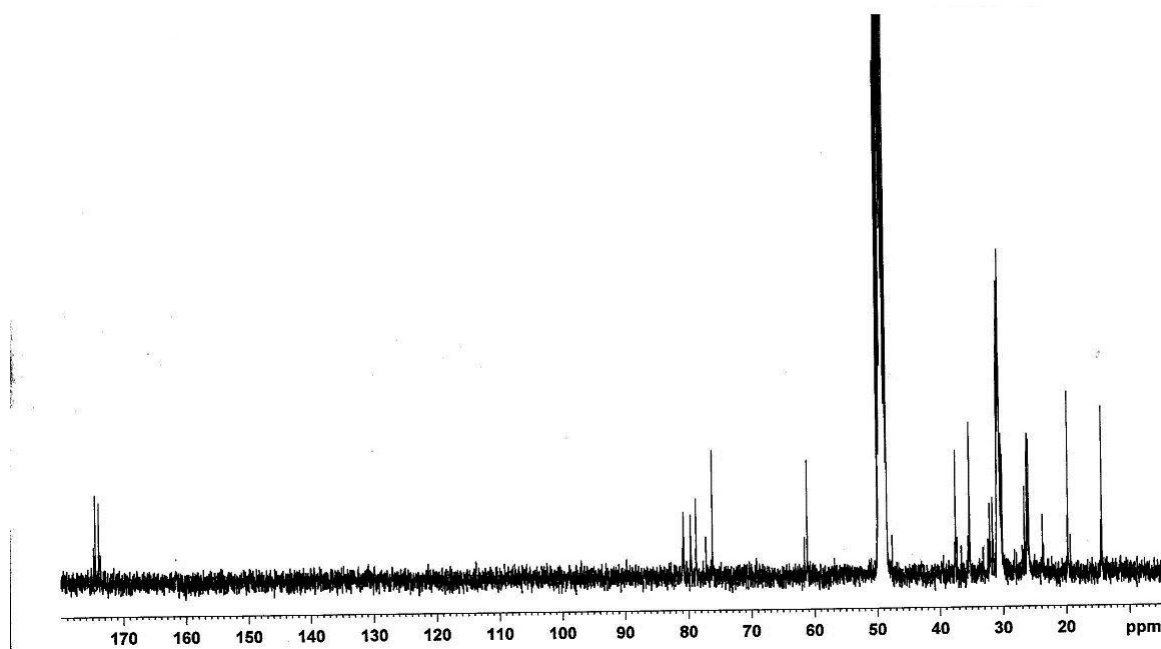

## H-NMR Spectrum compared with Natural Product

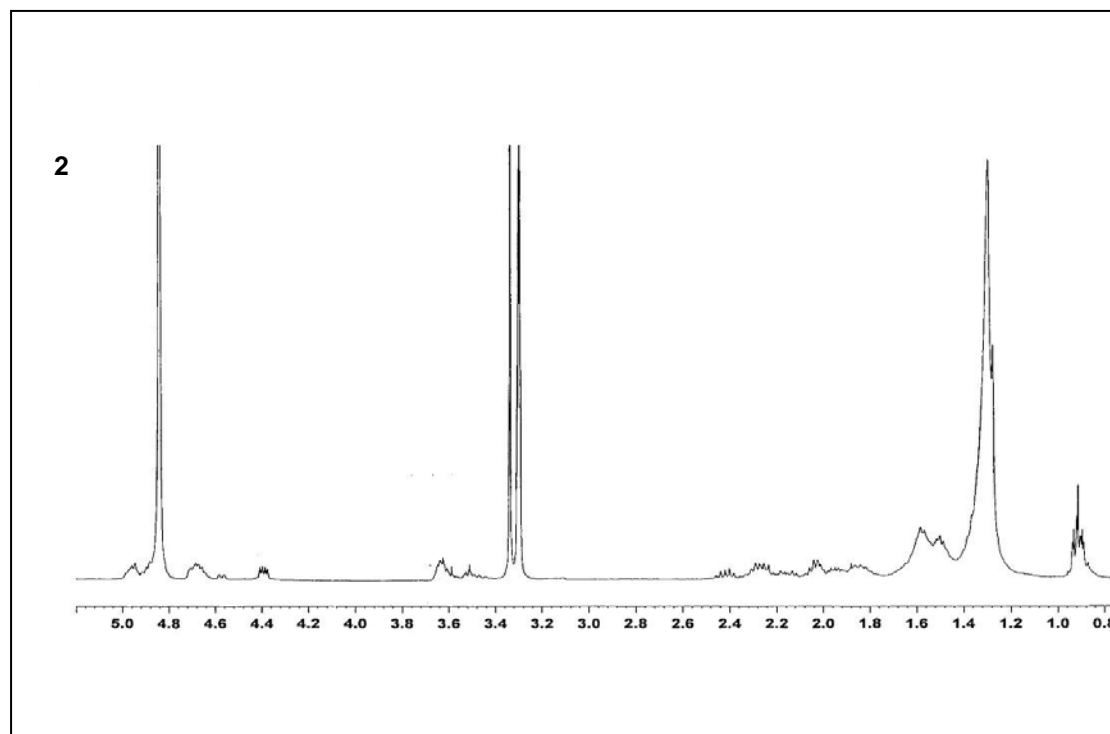

## Natural

S09NKO-S6215-23-1-PRESAT-CD300

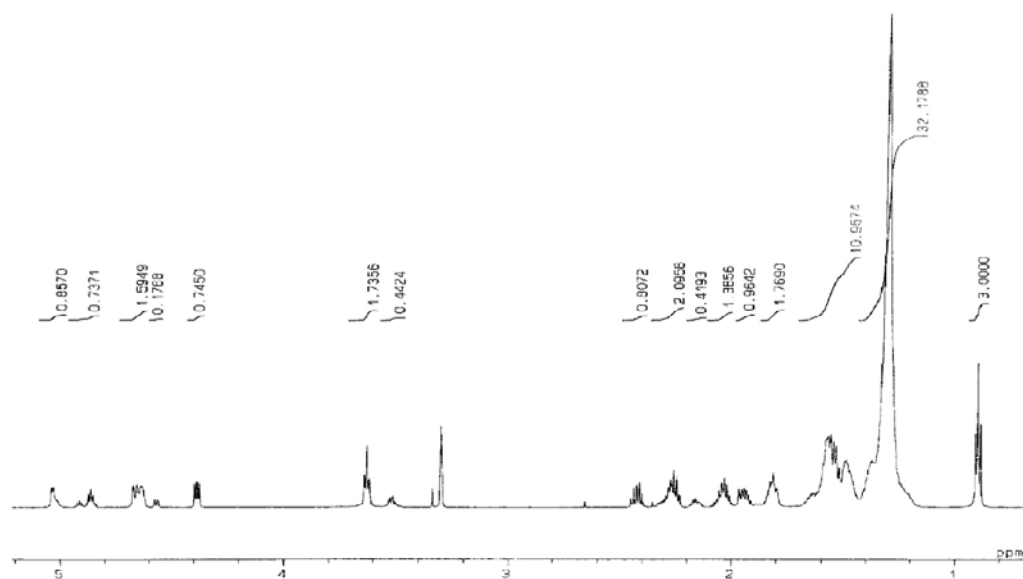

C-NMR Spectrum compared with Natural Product

2

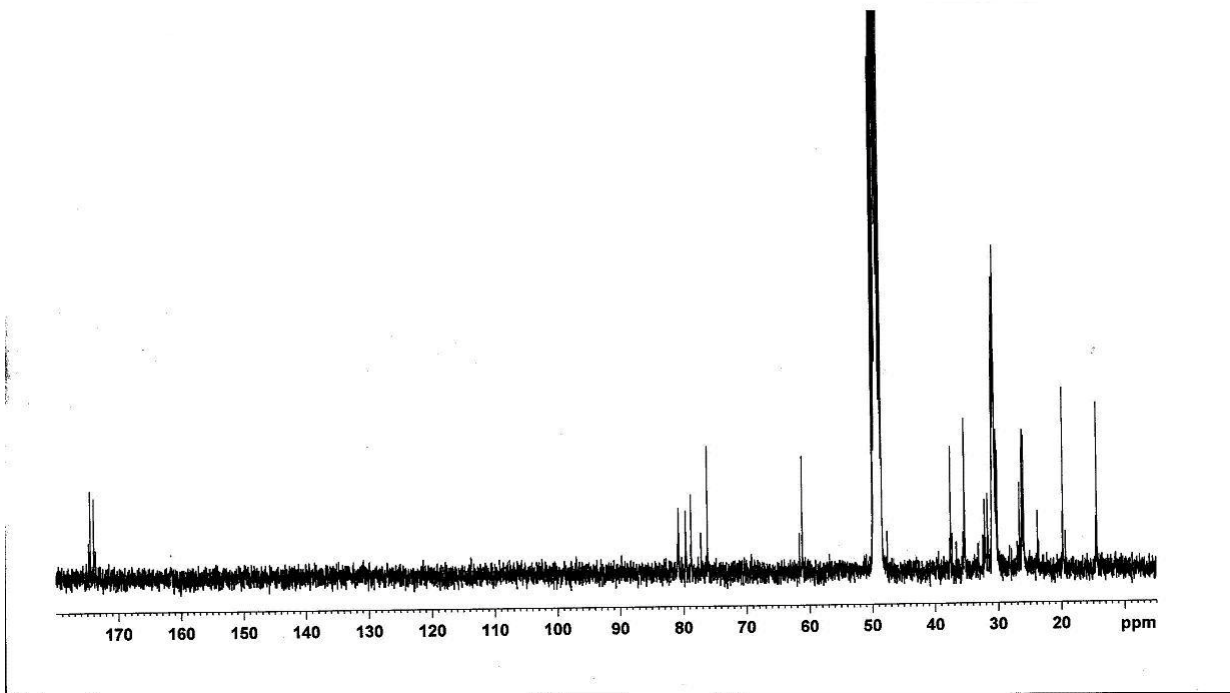

Natural

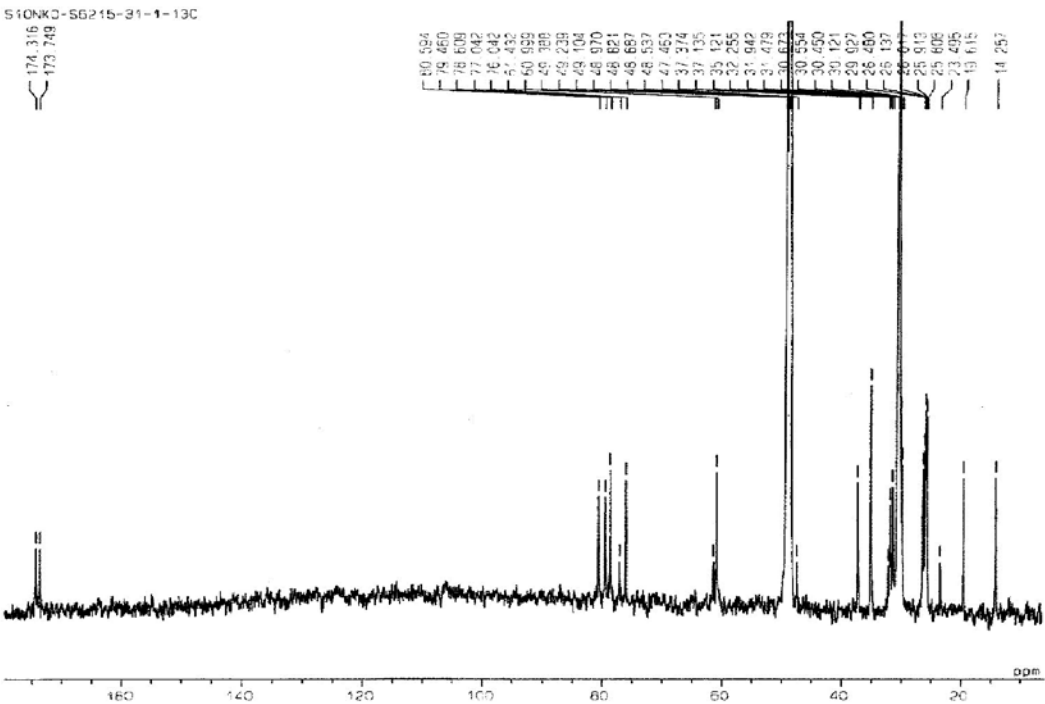

Supplement: c3ob42364f.pdf [file c3ob42364f.pdf]
